# Supplementary material
Source: publisher figshare collection journal article supplement (https://gsapubs.figshare.com/ndownloader/files/22746287)
Supplement: Supplementary file 1 [file 22746287]

## DATA REPOSITORY ITEM: SUPPLEMENTAL MATERIAL

### <sup>40</sup>Ar-<sup>39</sup>Ar METHODS

The incremental heating <sup>40</sup>Ar-<sup>39</sup>Ar measurements were performed at Oregon State University on whole-rock disks (~100 mg) cut from fresh surfaces of drill core and using a low-blank, double-vacuum resistance furnace (temperature-controlled with thermocouple) combined with a MAP-215/50 mass spectrometer. Sample preparation and instrumental conditions are described by Duncan et al. (1997). The mass spectrometer is a 90° sector instrument with a Nier-type source and all-metal extraction system. It has an electron multiplier for high sensitivity and an electrostatic analyzer with adjustable collector slit for an effective resolution (~600) of Ar peaks from small hydrocarbon peaks. Gas cleanup was accomplished with a series of Zr-Al getters. All argon ages were measured relative to the flux monitor standard FCT-3 biotite (28.03 ± 0.16 Ma, 2σ; Renne et al., 1998) and calculated using the corrected Steiger and Jäger (1977) decay constant of 5.530 ± 0.097 × 10<sup>-10</sup> yr<sup>-1</sup> (2σ) as reported by Min et al. (2000). Incremental heating plateau ages and isochron ages were calculated as weighted means with 1/σ<sup>2</sup> as weighting factor and as YORK2 least-squares fits with correlated errors (York, 1969) using the ArArCALC v2.2 software (Koppers, 2002) available from <http://earthref.org/tools/ararcalc.htm>.

To determine whether an incremental heating experiment yielded meaningful crystallization ages, we adopted the quality criteria proposed by Fleck et al. (1977) and Pringle (1993): (1) high temperature plateaus in the age spectra include more than three incremental heating steps and at least 50% of the total amount of <sup>39</sup>Ar released, (2) the plateau and isochron ages are concordant at the 95% confidence level, (3) the <sup>40</sup>Ar/<sup>36</sup>Ar intercepts in the isochron diagrams are equal to the atmospheric value of 295.5 at the 95% confidence level, and (4) the mean square of weighted deviations (York, 1969; Roddick, 1978) for both the plateau ages (MSWD = SUMS/N-1) and isochron ages (MSWD = SUMS/N-2) is less than the critical value for significance (~2.5). The complete data set is available at <http://www.earthref.org>.

**TABLE DR1.  $^{40}\text{Ar}$ - $^{39}\text{Ar}$  INCREMENTAL HEATING AGES FOR ODP HOLE 1213B BASALTS**

| Sample          | Material   | Total Fusion | $2\sigma$<br>error | Plateau Age<br>(Ma) | $2\sigma$<br>error | N   | MSWD | Isochron Age<br>(Ma) | $2\sigma$<br>error | $^{40}\text{Ar}/^{36}\text{Ar}$<br>initial | $2\sigma$<br>error | J        |
|-----------------|------------|--------------|--------------------|---------------------|--------------------|-----|------|----------------------|--------------------|--------------------------------------------|--------------------|----------|
|                 |            | Age<br>(Ma)  |                    |                     |                    |     |      |                      |                    |                                            |                    |          |
| 28R-2 (1-6)     | whole rock | 142.21       | 5.25               | none<br>developed   |                    |     |      | no isochron          |                    |                                            |                    | 0.001693 |
| 30R-3 (1-6)     | whole rock | 150.71       | 2.04               | 144.78              | 1.15               | 6/8 | 1.94 | 144.43               | 1.29               | 297.7                                      | 4.3                | 0.001706 |
| 33R-3 (115-120) | feldspar   | 143.39       | 3.33               | 143.74              | 3.02               | 7/7 | 0.33 | 142.73               | 3.48               | 298                                        | 4.8                | 0.001617 |

*Note:* N is the number of heating steps (defining plateau/total). MSWD is an F-statistic that compares the variance within step ages with the variance about the plateau age. J combines the neutron fluence with the monitor age. Note that ODP sample numbers indicate core (e.g. 28R), section (e.g. 2), and interval in centimeters within the section (e.g. 1-6). The complete data set is available at <http://www.earthref.org>.

**TABLE DR 2. Nd-Pb-Sr ISOTOPE RATIOS AND ISOTOPE-DILUTION CONCENTRATIONS**

| Sample                                | 1213B    |         |           |           |          |         | TN037    |
|---------------------------------------|----------|---------|-----------|-----------|----------|---------|----------|
|                                       | 28R-2    | 28R-2   | 31R-3     | 31R-3     | 33R-5    | 33R-5   | D9-1B    |
|                                       | (6-11)   | (6-11)  | (113-119) | (113-119) | (52-57)  | (52-57) |          |
|                                       | U        | L       | U         | L         | U        | L       | L        |
| $\epsilon_{\text{Nd}}(0)$             | +8.8     |         | +8.6      |           | +8.7     |         | +10.0    |
| $(^{143}\text{Nd}/^{144}\text{Nd})_0$ | 0.513093 |         | 0.513081  |           | 0.513087 |         | 0.513152 |
| $(^{87}\text{Sr}/^{86}\text{Sr})_0$   | 0.70305  | 0.70277 | 0.70295   | 0.70277   | 0.70295  | 0.70276 | 0.70284  |
| $(^{206}\text{Pb}/^{204}\text{Pb})_0$ | 18.642   |         | 18.565    |           | 18.412   |         | 18.477   |
| $(^{207}\text{Pb}/^{204}\text{Pb})_0$ | 15.469   |         | 15.467    |           | 15.454   |         | 15.491   |
| $(^{208}\text{Pb}/^{204}\text{Pb})_0$ | 38.155   |         | 38.135    |           | 37.986   |         | 37.880   |
| Nd (ppm)                              | 10.12    |         | 9.332     |           | 9.370    |         | 2.779    |
| Sm                                    | 3.308    |         | 3.004     |           | 3.007    |         | 1.251    |
| Sr                                    | 154.4    | 136.1   | 161.0     | 155.9     | 159.8    | 158.6   | 179.0    |
| Rb                                    | 0.797    | 0.217   | 1.41      | 0.387     | 1.17     | 1.296   | 4.75     |
| Pb                                    | 0.3168   |         | 0.3224    |           | 0.5083   |         | 0.1970   |
| U                                     | 0.0885   |         | 0.0777    |           | 0.07483  |         | 0.0574   |
| Th                                    | 0.2699   |         | 0.2556    |           | 0.2340   |         | 0.0977   |
| $(^{206}\text{Pb}/^{204}\text{Pb})_t$ | 18.242   |         | 18.221    |           | 18.203   |         | 18.086   |
| $(^{207}\text{Pb}/^{204}\text{Pb})_t$ | 15.449   |         | 15.450    |           | 15.444   |         | 15.472   |
| $(^{208}\text{Pb}/^{204}\text{Pb})_t$ | 37.756   |         | 37.765    |           | 37.772   |         | 37.662   |
| $(^{87}\text{Sr}/^{86}\text{Sr})_t$   | 0.70302  | 0.70276 | 0.70290   | 0.70275   | 0.70290  | 0.70271 | 0.70269  |
| $(^{143}\text{Nd}/^{144}\text{Nd})_t$ | 0.512912 |         | 0.512903  |           | 0.512909 |         | 0.512910 |
| $\epsilon_{\text{Nd}}(t)$             | +8.8     |         | +8.6      |           | +8.8     |         | +8.7     |

TABLE DR2. CONTINUED

| Sample                                | D14-1A   | D14-1A  | 464      | 1179D    |          |          |
|---------------------------------------|----------|---------|----------|----------|----------|----------|
|                                       |          |         | 34R-CC   | 13R-3    | 20R-2    | 22R-05   |
|                                       | U        | L       | L        | (26-29)  | (96-100) | (80-83)  |
|                                       |          |         |          | U        | G        | U        |
| $\epsilon_{\text{Nd}}(0)$             | +8.6     |         | +9.1     | +10.7    | +10.3    | +10.0    |
| $(^{143}\text{Nd}/^{144}\text{Nd})_0$ | 0.513085 |         | 0.513105 | 0.513189 | 0.513169 | 0.513155 |
| $(^{87}\text{Sr}/^{86}\text{Sr})_0$   | 0.70330  | 0.70307 | 0.70355  | 0.70314  | 0.70265  | 0.70286  |
| $(^{206}\text{Pb}/^{204}\text{Pb})_0$ | 18.449   |         | 18.597   | 18.130   | 18.308   | 18.233   |
| $(^{207}\text{Pb}/^{204}\text{Pb})_0$ | 15.468   |         | 15.504   | 15.439   | 15.458   | 15.448   |
| $(^{208}\text{Pb}/^{204}\text{Pb})_0$ | 37.959   |         | 38.053   | 37.588   | 37.807   | 37.742   |
| Nd (ppm)                              | 9.576    |         | 0.8661   | 4.42     | 10.28    | 10.57    |
| Sm                                    | 2.136    |         | 0.3175   | 1.712    | 3.337    | 3.517    |
| Sr                                    | 277.3    | 299.8   | 175.2    | 94.25    | 146.3    | 118.4    |
| Rb                                    | 20.6     | 13.5    | 11.6     | 11.5     | 2.25     | 2.13     |
| Pb                                    | 1.277    |         | 0.2520   | 0.4506   | 0.5029   | 0.7526   |
| U                                     | 0.2772   |         | 0.1046   | 0.0698   | 0.0860   | 0.0896   |
| Th                                    | 0.6694   |         | 0.1412   | 0.1380   | 0.2795   | 0.2834   |
| $(^{206}\text{Pb}/^{204}\text{Pb})_t$ | 18.140   |         | 18.145   | 17.935   | 18.091   | 18.081   |
| $(^{207}\text{Pb}/^{204}\text{Pb})_t$ | 15.453   |         | 15.482   | 15.430   | 15.447   | 15.441   |
| $(^{208}\text{Pb}/^{204}\text{Pb})_t$ | 37.715   |         | 37.853   | 37.462   | 37.576   | 37.586   |
| $(^{87}\text{Sr}/^{86}\text{Sr})_t$   | 0.70286  | 0.70280 | 0.70325  | 0.70249  | 0.70257  | 0.70276  |
| $(^{143}\text{Nd}/^{144}\text{Nd})_t$ | 0.512958 |         | 0.512946 | 0.512992 | 0.513003 | 0.512985 |
| $\epsilon_{\text{Nd}}(t)$             | +9.8     |         | +8.7     | +10.1    | +10.3    | +10.0    |

Note: G, glass; U, unleached, but acid-washed handpicked chips; L, strongly acid-leached after Mahoney (1987); for the D14 and D9 samples, preliminary leaching steps with hydrogen peroxide and hydroxylamine hydrochloride removed ferromanganese and organic material. Measured isotope ratios (subscript 0) are age-corrected ( $t$ ) to 144 Ma for Hole 1213B and D14-1A, to 136 Ma for D9-1B, to 110 Ma for Hole 464, and to 129 Ma for Hole 1179D. Measurements were made on the Hawaii VG Sector multicollector instrument. Data are reported relative to  $^{87}\text{Sr}/^{86}\text{Sr} = 0.71024$  for NBS 987 Sr and to  $^{143}\text{Nd}/^{144}\text{Nd} = 0.511850$  for La Jolla Nd; the total range measured for NBS 987 Sr over a three-year period was  $\pm 0.000018$ ; for La Jolla Nd it was  $\pm 0.000010$  (0.2  $\epsilon_{\text{Nd}}$  units). Pb isotope ratios for Hole 1213B and 1179D samples were measured with a double-spike method (Galer, 1999); mean values obtained for 5-ng loads of NBS 981 Pb over a three-year period were 16.937, 15.492, and 36.710 for  $^{206}\text{Pb}/^{204}\text{Pb}$ ,  $^{207}\text{Pb}/^{204}\text{Pb}$ , and  $^{208}\text{Pb}/^{204}\text{Pb}$ , with a total range of 220 ppm. Pb isotope ratios for D9-1B, D14-1a, and Site 464 are reported relative to Todt et al.'s (1996) values for NBS 981; the total range for non-double-spike measurements of NBS 981 is  $\pm 0.011$ ,  $\pm 0.012$ , and  $\pm 0.038$  for  $^{206}\text{Pb}/^{204}\text{Pb}$ ,  $^{207}\text{Pb}/^{204}\text{Pb}$ , and  $^{208}\text{Pb}/^{204}\text{Pb}$ , respectively. Within-run errors on the isotopic data above are less than or equal to the external uncertainties on the standards. Uncertainties on concentrations are less than 0.2% for Sm and Nd, 0.4% for Sr, 0.5% for Pb, 1% for U, and 2% for Th. Total procedural blanks are <40 pg for Pb, <35 pg for Sr, and <12 pg for Nd. Note that  $\epsilon_{\text{Nd}} = 0$  today corresponds to  $^{143}\text{Nd}/^{144}\text{Nd} = 0.51264$ ; values for older times assume present bulk-earth  $^{147}\text{Sm}/^{144}\text{Nd} = 0.1967$ .

**TABLE DR3. BULK-ROCK MAJOR AND TRACE ELEMENT DATA**

| Sample                           | 1213B<br>28R-2<br>(6-11) | 1213B<br>31R-3<br>(113-119) | 1213B<br>33R-5<br>(52-57) | 1179D<br>20R-2<br>(96-100) G | 1179D<br>22R-05<br>(80-83) | BHVO-1<br>meas. | BHVO-1<br>recomm. |
|----------------------------------|--------------------------|-----------------------------|---------------------------|------------------------------|----------------------------|-----------------|-------------------|
| SiO <sub>2</sub> (wt%)           | 49.65                    | 49.25                       | 48.88                     | 48.99                        | 50.01                      | 49.89           | 49.59             |
| TiO <sub>2</sub>                 | 1.61                     | 1.47                        | 1.45                      | 1.52                         | 1.68                       | 2.74            | 2.69              |
| Al <sub>2</sub> O <sub>3</sub>   | 14.41                    | 14.78                       | 14.64                     | 15.93                        | 16.91                      | 13.71           | 13.70             |
| Fe <sub>2</sub> O <sub>3</sub> * | 13.07                    | 12.66                       | 12.45                     | 11.17                        | 9.30                       | 12.44           | 12.39             |
| MnO                              | 0.20                     | 0.17                        | 0.17                      | 0.17                         | 0.30                       | 0.17            | 0.17              |
| MgO                              | 7.64                     | 7.72                        | 8.31                      | 8.04                         | 7.66                       | 7.26            | 7.22              |
| CaO                              | 12.01                    | 12.46                       | 12.25                     | 12.02                        | 12.23                      | 11.42           | 11.32             |
| Na <sub>2</sub> O                | 2.06                     | 1.92                        | 1.87                      | 2.31                         | 2.16                       | 2.24            | 2.24              |
| K <sub>2</sub> O                 | 0.09                     | 0.12                        | 0.11                      | 0.16                         | 0.11                       | 0.51            | 0.52              |
| P <sub>2</sub> O <sub>5</sub>    | 0.15                     | 0.15                        | 0.14                      | 0.14                         | 0.17                       | 0.27            | 0.27              |
| Total                            | 100.87                   | 100.71                      | 100.27                    | 100.45                       | 100.53                     | 100.65          | 100.11            |
| L.O.I.                           | 2.29                     | 1.74                        | 1.30                      |                              | 4.38                       |                 |                   |
| Cs (ppm)                         | 0.022                    | 0.026                       | 0.029                     | 0.046                        | 0.013                      | 0.13            | 0.10              |
| Rb                               | 0.74                     | 1.5                         | 1.3                       | 2.5                          | 0.75                       | 9.8             | 9.5               |
| Ba                               | 14.8                     | 16.1                        | 15.5                      | 34.9                         | 31.8                       | 133             | 133               |
| Th                               | 0.23                     | 0.24                        | 0.23                      | 0.36                         | 0.44                       | 1.10            | 1.26              |
| U                                | 0.087                    | 0.082                       | 0.079                     | 0.11                         | 0.14                       | 0.42            | 0.42              |
| Nb                               | 5.2                      | 4.5                         | 4.3                       | 4.0                          | 4.2                        | 19.1            | 19.5              |
| Ta                               | 0.31                     | 0.28                        | 0.28                      | 0.30                         | 0.30                       | 1.15            | 1.20              |
| La                               | 4.81                     | 4.35                        | 4.21                      | 4.43                         | 4.48                       | 15.9            | 15.5              |
| Ce                               | 13.2                     | 11.8                        | 11.6                      | 12.9                         | 13.1                       | 37.7            | 38.0              |
| Pr                               | 2.08                     | 1.90                        | 1.89                      | 2.17                         | 2.22                       | 5.44            | 5.45              |
| Pb                               | 0.482                    | 0.456                       | 0.517                     | 0.472                        | 0.830                      | 2.10            | 2.10              |
| Sr                               | 167                      | 157                         | 156                       | 138                          | 153                        | 369             | 390               |
| Nd                               | 11.0                     | 9.9                         | 9.7                       | 10.7                         | 11.1                       | 24.7            | 24.7              |
| Hf                               | 2.52                     | 2.35                        | 2.32                      | 2.56                         | 2.68                       | 4.40            | 4.30              |
| Zr                               | 90.0                     | 82.7                        | 82.1                      | 86.6                         | 92.4                       | 169             | 180               |
| Sm                               | 3.32                     | 3.15                        | 3.14                      | 3.58                         | 3.55                       | 6.08            | 6.17              |
| Eu                               | 1.22                     | 1.16                        | 1.15                      | 1.28                         | 1.29                       | 1.97            | 2.06              |
| Gd                               | 4.29                     | 3.98                        | 3.99                      | 4.72                         | 4.78                       | 6.40            | 6.22              |
| Tb                               | 0.76                     | 0.70                        | 0.70                      | 0.86                         | 0.85                       | 0.96            | 0.95              |
| Dy                               | 4.59                     | 4.21                        | 4.19                      | 5.31                         | 5.33                       | 5.19            | 5.25              |
| Y                                | 28.0                     | 25.4                        | 24.7                      |                              |                            | 27.3            | 28                |
| Ho                               | 1.01                     | 0.94                        | 0.92                      | 1.17                         | 1.15                       | 0.99            | 1.00              |
| Er                               | 2.61                     | 2.42                        | 2.40                      | 3.20                         | 3.13                       | 2.39            | 2.56              |
| Tm                               | 0.39                     | 0.35                        | 0.36                      | 0.49                         | 0.47                       | 0.33            |                   |
| Yb                               | 2.55                     | 2.32                        | 2.27                      | 3.19                         | 3.10                       | 2.02            | 1.98              |
| Lu                               | 0.39                     | 0.35                        | 0.34                      | 0.52                         | 0.49                       | 0.29            | 0.28              |
| Sc                               | 51.5                     | 42.5                        | 46.5                      |                              |                            | 32.5            | 31.8              |
| Cr                               | 285                      | 287                         | 316                       |                              |                            | 292             | 289               |
| Co                               | 53                       | 49                          | 49                        |                              |                            | 45              | 45                |
| Ni                               | 82                       | 85                          | 94                        |                              |                            | 123             | 120               |

Note: Fe<sub>2</sub>O<sub>3</sub>\*, total iron as Fe<sub>2</sub>O<sub>3</sub>; L.O.I., weight loss on ignition to 1100°C. G, glass. Measurements were made on the Hawaii Siemens 303-AS XRF spectrometer (major elements) and VG PQ-2S ICP-MS instrument (trace elements). Relative precision is ~0.5% for SiO<sub>2</sub>, ~1% for other major elements; for trace elements it is <5% at levels above 0.5 ppm in the rock. Comparison of measured (mean of 15 analyses) and recommended (Govindaraju, 1994; Eggins et al., 1997) values for the BHVO-1 standard gives an indication of accuracy.

## REFERENCES CITED

- Duncan, R.A., Hooper, P.R., Rehacek, J., Marsh, J., and Duncan, A.R., 1997. The timing and duration of the Karoo igneous event, southern Gondwana: *Journal of Geophysical Research*, v. 102, p. 18,127-18,138.
- Eggins, S.M., Woodhead, J.D., Kinsley, L.P.J., Mortimer, G.E., Sylvester, P., McCulloch, M.T., Hergt, J.M., and Handler, M.R., 1997. A simple method for the precise determination of  $\geq 40$  trace elements in geological samples by ICPMS using enriched isotope internal standardization: *Chemical Geology*, v. 134, p. 311-326.
- Fleck, R.J., Sutter, J.F., and Elliot, D.H., 1977. Interpretation of discordant  $^{40}\text{Ar}/^{39}\text{Ar}$  age-spectra of Mesozoic tholeiites from Antarctica: *Geochimica et Cosmochimica Acta*, v. 41, p. 15-32.
- Galer, S.J.G., 1999. Optimal double and triple spiking for high precision lead isotopic measurement: *Chemical Geology*, v. 157, p. 255-274.
- Govindaraju, K., 1994. Compilation of working values and sample descriptions for 383 geostandards: *Geostandards Newsletter*, Special Issue 18, p. 15-16.
- Koppers, A.A.P., 2002. ArArCALC - software for Ar-40/Ar-39 age calculations: *Computers & Geosciences*, v. 28, p. 605-619.
- Mahoney, J.J., 1987. An isotopic survey of Pacific oceanic plateaus: implications for their nature and origin: *in* Keating, B., Fryer, P., Batiza, R., and Boehlert, G., eds., *Seamounts, Islands, and Atolls*: American Geophysical Union Monograph 43, p. 207-220.
- Min, K.W., Mundil, R., Renne, P.R., and Ludwig, K.R., 2000. A test for systematic errors in  $^{40}\text{Ar}$ - $^{39}\text{Ar}$  geochronology through comparison with U/Pb analysis of a 1.1-Ga rhyolite: *Geochimica et Cosmochimica Acta*, v. 64, p. 73-98.
- Pringle, M.S., 1993. Age progressive volcanism in the Musicians Seamounts: a test of the hot spot hypothesis for the late Cretaceous Pacific: *in* Pringle, M.S., Sager, W.W., Sliter, W.V., Stein, S., eds., *The Mesozoic Pacific: Geology, Tectonics, and Volcanism*: American Geophysical Union Monograph 77, p. 187-216.
- Renne, P.R., Swisher, C.C., Deino, A.L., Karner, D.B., Owens, T.L., and DePaolo, D.J., 1998. Intercalibration of standards, absolute ages and uncertainties in  $^{40}\text{Ar}/^{39}\text{Ar}$  dating: *Chemical Geology*, v. 145, p. 117-152.
- Roddick, J.C., 1978. The application of isochron diagrams in  $^{40}\text{Ar}$ - $^{39}\text{Ar}$  dating: a discussion: *Earth and Planetary Science Letters*, v. 41, p. 233-244.
- Steiger, R.H., Jäger, E., 1977. Subcommittee on geochronology: convention on the use of decay constants in geo- and cosmochemistry: *Earth and Planetary Science Letters*, v. 36, p. 359-362.
- Todt, W., Cliff, R.A., Hanser, A., Hoffman, A.W., 1996. Evaluation of a  $^{202}\text{Pb}$ - $^{205}\text{Pb}$  double spike for high-precision lead isotope analysis: *in* Basu A., Hart, S., eds., *Earth Processes: Reading the Isotopic Code*: American Geophysical Union Monograph 95, p. 429-437.
- York, D., 1969. Least squares fitting of a straight line with correlated errors: *Earth and Planetary Science Letters*, v. 5, p. 320-324.
